1 **Reduced H<sup>+</sup> channel activity disrupts pH homeostasis and calcification in**  
2 **coccolithophores at low ocean pH**

3

4 Dorothee Kottmeier<sup>1,3</sup>, Abdul Chrachri<sup>1</sup>, Gerald Langer<sup>1</sup>, Katherine Helliwell<sup>1,4</sup>, Glen L.  
5 Wheeler<sup>1\*</sup>, Colin Brownlee<sup>1,2\*</sup>

6

7 <sup>1</sup>Marine Biological Association, The Laboratory, Citadel Hill, Plymouth. PL1 2PB

8 <sup>2</sup>School of Ocean and Earth Science, University of Southampton, Southampton, SO14 3ZH,  
9 UK.

10 <sup>3</sup>MARUM Center for Marine Environmental Sciences, University of Bremen, 28334  
11 Bremen, Germany

12 <sup>4</sup>Biosciences, College of Life and Environmental Sciences, University of Exeter, Exeter, EX4  
13 4QD, UK

14

15

16

17

18 \*Correspondence: [cbr@mba.ac.uk](mailto:cbr@mba.ac.uk) and [glw@mba.ac.uk](mailto:glw@mba.ac.uk)

19

20

21 **Key words:** Calcification, coccolithophore, *Coccolithus braarudii*, pH regulation, H<sup>+</sup> channel

22

23

24 **Abstract**

25 Coccolithophores produce the bulk of ocean biogenic calcium carbonate but this process is  
26 predicted to be negatively affected by future ocean acidification scenarios. Since  
27 coccolithophores calcify intracellularly, the mechanisms through which changes in seawater  
28 carbonate chemistry affect calcification remain unclear. Here we show that voltage-gated H<sup>+</sup>  
29 channels in the plasma membrane of *Coccolithus braarudii* serve to regulate pH and maintain  
30 calcification under normal conditions, but have greatly reduced activity in cells acclimated to  
31 low pH. This disrupts intracellular pH homeostasis and impairs the ability of *C. braarudii* to  
32 remove H<sup>+</sup> generated by the calcification process, leading to specific coccolith malformations.  
33 These coccolith malformations can be reproduced by pharmacological inhibition of H<sup>+</sup>  
34 channels. Heavily-calcified coccolithophore species such as *C. braarudii*, which make the  
35 major contribution to carbonate export to the deep ocean, have a large intracellular H<sup>+</sup> load and  
36 are likely to be most vulnerable to future decreases in ocean pH.

37

38

## 39 Introduction

40 Anthropogenic CO<sub>2</sub> emissions and the subsequent dissolution of CO<sub>2</sub> in seawater have  
41 resulted in substantial changes in ocean carbonate chemistry<sup>1</sup>. The resultant decrease in  
42 seawater pH, termed ocean acidification, is predicted to be particularly detrimental for  
43 calcifying organisms<sup>2</sup>. Mean global surface ocean pH is predicted to fall as low as 7.7 by 2100  
44<sup>3</sup> and is likely to continue to fall further in the following centuries. Present day marine  
45 organisms can experience significant fluctuations in seawater pH, particularly in coastal and  
46 upwelling regions<sup>4,5</sup>. Ocean acidification is therefore predicted to have an important influence  
47 not only on mean surface ocean pH, but also on the extremes of pH experienced by marine  
48 organisms<sup>6,7</sup>. Coccolithophores, characterised by their covering of intricately-formed calcite  
49 scales (coccoliths), account for the bulk of global biological calcification and around 20% of  
50 ocean productivity, making major contributions to global biogeochemical cycles, including the  
51 long-term export of both inorganic and organic carbon from the ocean photic zone to deep  
52 waters<sup>8,9</sup>. Unlike the vast majority of calcifying organisms, coccolithophore calcification  
53 occurs in an intracellular compartment, the Golgi-derived coccolith vesicle (CV), effectively  
54 isolating the calcification process from direct changes in seawater carbonate chemistry.  
55 Nevertheless, extensive laboratory observations indicate that ocean acidification may  
56 negatively impact coccolithophore calcification, albeit with significant variability of responses  
57 between species and strains<sup>10-14</sup>. The negative impact on calcification rates occurs at calcite  
58 saturation states ( $\Omega$ ) >1, indicating it results primarily from impaired cellular production rather  
59 than dissolution<sup>10,15</sup>. However, prediction of how natural coccolithophore populations may  
60 respond to future changes in ocean pH are hampered by lack of mechanistic understanding of  
61 pH impacts at the cellular level<sup>10</sup>.

62 As calcification occurs intracellularly using external HCO<sub>3</sub><sup>-</sup> as the primary dissolved  
63 inorganic carbon (DIC) source<sup>16-18</sup>, coccolith formation is not directly dependent on external  
64 CO<sub>3</sub><sup>2-</sup> concentrations. However, the uptake of HCO<sub>3</sub><sup>-</sup> as a substrate for calcification results in  
65 the equimolar production of CaCO<sub>3</sub> and H<sup>+</sup> in the CV<sup>18</sup>. In order to maintain saturation  
66 conditions for calcite formation, H<sup>+</sup> produced by the calcification process must be rapidly  
67 removed from the CV, placing extraordinary demands for cellular pH regulation to prevent  
68 cellular acidosis<sup>18</sup>.

69 Lower calcification rates under ocean acidification conditions appear to be primarily  
70 due to decreased pH rather than other aspects of carbonate chemistry<sup>10,19,20</sup>. Coccolithophores  
71 exhibit highly unusual membrane physiology, including the presence of voltage-gated H<sup>+</sup>

72 channels in the plasma membrane<sup>21</sup> and a high sensitivity of cytosolic pH ( $\text{pH}_{\text{cyt}}$ ) to changes  
73 in external pH ( $\text{pH}_o$ )<sup>21,22</sup>. Voltage-gated  $\text{H}^+$  channels are associated with rapid  $\text{H}^+$  efflux in a  
74 number of specialised animal cell types<sup>23</sup> and contribute to effective pH regulation in  
75 coccolithophores<sup>21</sup>. As  $\text{H}^+$  channel function is dependent on the electrochemical gradient of  
76  $\text{H}^+$  across the plasma membrane, this mechanism could be impaired under lower seawater pH.  
77 However, it remains unknown whether  $\text{H}^+$  channels play a direct role in removal of  
78 calcification-derived  $\text{H}^+$  or contribute to the sensitivity of coccolithophores to ocean  
79 acidification.

80 Coccolithophores exhibit significant diversity in their extent of calcification  
81 (Supplementary Fig. 1). The abundant bloom forming species *Emiliania huxleyi* is moderately  
82 calcified (ratio of particulate inorganic carbon to particulate organic carbon (PIC/POC) of  
83 around 1) and has been the focus of the vast majority of the studies into the effects of  
84 environmental change in coccolithophores<sup>13</sup>. Coastal species belonging to the  
85 Pleurochrysidaceae and Hymenomonadaceae are lightly calcified, commonly exhibiting a  
86 PIC/POC of less than 0.5<sup>24-27</sup>. Species such as *Coccolithus braarudii*, *Calcidiscus leptoporus*  
87 and *Helicosphaera carteri* exhibit much higher PIC/POC ratios and contribute the majority of  
88 carbonate export to the deep ocean in many areas<sup>28-30</sup>. The physiological response of heavily-  
89 calcified coccolithophores to ocean acidification is therefore of considerable biogeochemical  
90 significance. Growth and calcification rates in *C. leptoporus* and *C. braarudii* are sensitive to  
91 pH values predicted to prevail on a future decadal timescale<sup>10, 15, 31, 32</sup>. However, a mechanistic  
92 understanding of the different sensitivity of coccolithophore species to changing ocean  
93 carbonate chemistry is lacking.

94 The net  $\text{H}^+$  load in a cell is determined by the combination of metabolic processes that  
95 consume or produce  $\text{H}^+$ .  $\text{H}^+$  fluxes in coccolithophores will be primarily determined by the  
96 balance of  $\text{H}^+$  consumed by photosynthesis and  $\text{H}^+$  generated by calcification, with uptake of  
97 different carbon sources a particularly important consideration (Fig. 1a).  $\text{CO}_2$  uptake for  
98 photosynthesis results in no net production or consumption of  $\text{H}^+$ , whereas uptake of  $\text{HCO}_3^-$   
99 requires the equimolar consumption of  $\text{H}^+$  in order to generate  $\text{CO}_2$ . Growth at elevated  $\text{CO}_2$   
100 causes a switch from  $\text{HCO}_3^-$  uptake to predominately  $\text{CO}_2$  uptake in *E. huxleyi*<sup>33, 34</sup>. The  
101 associated net decrease in  $\text{H}^+$  consumption will therefore increase the  $\text{H}^+$  load in  
102 coccolithophores grown at elevated  $\text{CO}_2$ , which may exacerbate the potential for cytosolic  
103 acidosis caused by lower seawater pH.

104            In this study we set out to better understand the cellular mechanisms underlying the  
105 sensitivity of coccolithophore calcification to lower pH. We subjected the heavily-calcified  
106 species *C. braarudii*, which is commonly found in temperate upwelling regions<sup>35, 36</sup>, to  
107 conditions that reflect the range of pH values it may experience in current and future oceans.  
108 We show that acclimation to low pH leads to loss of H<sup>+</sup> channel function and disruption of  
109 cellular pH regulation in *C. braarudii*. These effects are coincident with very specific defects  
110 in coccolith morphology that can be reproduced by direct inhibition of H<sup>+</sup> channels. We  
111 conclude that H<sup>+</sup> efflux through H<sup>+</sup> channels is essential for maintaining both calcification rate  
112 and coccolith morphology. By providing a mechanistic insight into pH regulation during the  
113 calcification process, our results indicate that disruption of coccolithophore calcification in a  
114 future acidified ocean is likely to be most severe in heavily calcified species.

## 115 **Results**

### 116 **Cellular H<sup>+</sup> load varies with DIC use for calcification and photosynthesis.**

117 To examine more closely how the balance of photosynthesis and calcification may  
118 influence the cellular H<sup>+</sup> load, we measured physiological parameters in *C. braarudii* cells  
119 acclimated to a broad range of carbonate chemistries (Supplementary Table 1). *C. braarudii*  
120 exhibited pH optima for growth, PIC and POC production of  $8.32 \pm 0.01$ ,  $8.20 \pm 0.03$  and  $8.24$   
121  $\pm 0.02$  respectively (pH<sub>NBS</sub>, n=3,  $\pm$ SE), with sharp declines in these parameters exhibited by  
122 cells grown at pH 7.85 and 7.55 (Fig. 1b-d). PIC production decreased more strongly than  
123 POC production in acidified conditions, leading to lower PIC:POC ratios. These trends are in  
124 close agreement with other laboratory studies examining the response of *C. braarudii* to  
125 changing carbonate chemistries<sup>10, 15, 31, 32, 37</sup>. Calculation of the H<sup>+</sup> load from values of PIC  
126 and POC production indicated that H<sup>+</sup> production by calcification exceeded H<sup>+</sup> consumption  
127 by photosynthesis under all scenarios, being highest at optimal PIC:POC ratios (Fig. 1e).  
128 Although the large decrease in calcification rates at seawater pH 7.55 result in lower H<sup>+</sup>  
129 production, the net H<sup>+</sup> load could still be substantial due to a likely increase in CO<sub>2</sub> uptake  
130 under these conditions (Fig. 1e)<sup>34</sup>. The results illustrate that changes in the relative rates of  
131 photosynthesis and calcification, as well as in the carbon source used for photosynthesis, will  
132 have a major impact on the cellular H<sup>+</sup> budget in *C. braarudii*, although in all cases there is a  
133 resultant requirement for net H<sup>+</sup> efflux.

134

### 135 **Growth at low pH results in specific defects in coccolith morphology**

136 Morphological defects in coccoliths are widely reported in coccolithophores grown  
137 under simulated ocean acidification conditions<sup>37, 38</sup>, although there is little information on the  
138 specific nature of these malformations to aid mechanistic understanding of the impacts of low  
139 seawater pH on the calcification process. Scanning electron microscopy (SEM) analysis of  
140 coccolith morphology revealed that only  $19.0 \pm 5.0$  % and  $30.1 \pm 2.7$  % of coccoliths exhibited  
141 normal morphology at pH 7.55 and pH 7.85 respectively (n=3,  $\pm$ SE) (Fig. 2a,b). Moreover, by  
142 performing a detailed categorisation of each morphological defect, we found a very distinct  
143 ‘type-pH’ malformation at low pH, in which the shield elements are malformed and greatly  
144 reduced in length so that the coccolith appears as a ring of calcite rather than a fully formed  
145 shield (Fig. 2b). This differs from an immature coccolith, in which the individual elements are  
146 reduced in length but correctly formed (Supplementary Fig. 2). Cells grown at low pH  
147 exhibited a large increase in the number of collapsed coccospheres observed by SEM analysis

148 (Fig. 2c-d), indicating that the extensive malformations result in an inability to maintain the  
149 structural integrity of the coccosphere. Although the type-pH malformation has not been  
150 explicitly described previously, it can clearly be observed in other studies where *C. braarudii*  
151 has been grown at low pH<sup>37</sup>. Importantly, type-pH malformations are distinct from coccolith  
152 malformations induced by other stressors, such as phosphate limitation or the Si analogue Ge  
153<sup>39, 40</sup>.

154

### 155 **H<sup>+</sup> channel function is greatly reduced following acclimation to lower pH**

156 To investigate how these defects in coccolith morphology could arise, we examined the  
157 physiology of *C. braarudii* cells grown at low pH. *C. braarudii* exhibits an unusual large  
158 outwardly rectifying H<sup>+</sup> current at membrane potentials positive of the H<sup>+</sup> equilibrium potential  
159 (E<sub>H+</sub>), due to the activity of voltage-gated H<sup>+</sup> channels in the plasma membrane<sup>21</sup>. Our previous  
160 studies showed that the H<sup>+</sup> channel activation potential tracked E<sub>H+</sub> across the plasma membrane.  
161 Calculation of the proton motive force (pmf) across the *C. braarudii* plasma membrane (at a  
162 resting membrane potential of -46 mV<sup>21</sup>) indicates that there is a small net outward pmf at a  
163 seawater pH of 8.15 (Fig 3a). A decrease in pH<sub>cyt</sub> results in a shift in the activation potential of  
164 the H<sup>+</sup> current to more negative membrane potential values and increases the outwardly-  
165 directed pmf. These combined effects result in net H<sup>+</sup> efflux and allow restoration of resting  
166 pH<sub>cyt</sub> (Supplementary Fig. 3). However, at pH<sub>o</sub> 7.55 the activation potential shifts to more  
167 positive values and the calculated pmf is no longer outward, so channel mediated H<sup>+</sup> efflux  
168 would only occur following depolarisation of the membrane potential and/or further reductions  
169 in pH<sub>cyt</sub> (Supplementary Figure 3).

170 In order to determine the impact of growth at unfavourable seawater pH on H<sup>+</sup> channel  
171 function, we monitored H<sup>+</sup> currents using patch clamp recordings in *C. braarudii* cells  
172 previously acclimated to pH<sub>o</sub> 7.55, 8.15 or 8.75. The mean amplitude of the outward H<sup>+</sup>  
173 current, when measured at pH<sub>o</sub> 8.15, was greatly reduced in cells that had been acclimated to  
174 pH 7.55 (Fig. 3b-d). 52.9% of cells acclimated to pH 7.55 exhibited either greatly reduced or  
175 undetectable outward current (Fig. 3d), although these cells still displayed inward Cl<sup>-</sup> currents  
176 typical of healthy *C. braarudii* cells<sup>41</sup> (Supplementary Fig.4). The outward currents exhibited  
177 a reversal potential (E<sub>rev</sub>) close to E<sub>H+</sub>, indicating that H<sup>+</sup> remained as the primary charge carrier  
178 in all cases (Fig. 3e). The results suggest that acclimation of *C. braarudii* to a low seawater pH  
179 unsuited to the operation of H<sup>+</sup> channels results in the loss of H<sup>+</sup> channel function.

180

## 181 **A unique family of H<sup>+</sup> channels in calcifying coccolithophores**

182 Homologues of the mammalian voltage-gated H<sup>+</sup> channel, Hv1, are present in  
183 coccolithophores and a range of other phytoplankton, although the large outward H<sup>+</sup> currents  
184 typical of *C. braarudii* have not been reported in other algal cells, suggesting that H<sup>+</sup> channels  
185 are utilised for alternative roles in non-calcifying cells (e.g. in supporting NADPH oxidase  
186 activity<sup>42</sup> or in dinoflagellate bioluminescence<sup>43, 44</sup>). We previously characterised Hv1  
187 channels from *E. huxleyi* and *C. braarudii*<sup>21</sup>. Further analysis of haptophyte transcriptomes<sup>45</sup>  
188 revealed that coccolithophores possess an additional H<sup>+</sup> channel homologue (Hv2) that was not  
189 found in non-calcifying haptophytes (Supplementary Fig.5). *C. braarudii* Hv2 exhibited robust  
190 H<sup>+</sup> currents when expressed in a heterologous system (Supplementary Fig.5). The presence of  
191 this additional homologue suggests that coccolithophore H<sup>+</sup> channels have undergone  
192 functional specialisation related to calcification. In support of a specific role in calcification,  
193 we found that *HV1* and *HV2* were only expressed in the heavily calcified heterococcolith-  
194 bearing diploid life cycle phase of *C. braarudii* and were not detected in the lightly calcified  
195 holococcolith-bearing haploid life cycle phase (Supplementary Fig.6). However, we did not  
196 find any significant change in the expression of either *HV1* or *HV2* in diploid cells acclimated  
197 to low pH (Supplementary Fig.6). This suggests that the greatly reduced H<sup>+</sup> conductance in  
198 these cells results from post-transcriptional or post-translational regulation of H<sup>+</sup> channels.

199

## 200 **pH homeostasis is disrupted at low seawater pH**

201 To determine whether the reduced H<sup>+</sup> channel activity in cells acclimated to low pH led  
202 to disrupted cellular pH homeostasis, we examined resting pH<sub>cyt</sub>. Cells acclimated to pH 7.55  
203 exhibited a significantly lower mean pH<sub>cyt</sub> values than cells acclimated to pH 8.15 or pH 8.75  
204 (Fig. 4a, Supplementary Fig.7). Cells acclimated to pH 8.15 or 8.75 retained the ability to adjust  
205 intracellular pH rapidly within seconds when exposed to a higher or lower pH<sup>21, 22</sup>, but this  
206 response was greatly reduced in cells acclimated to pH 7.55 (Fig. 4b-d). To determine the  
207 capacity for H<sup>+</sup> efflux, we transiently exposed cells to pH 6.5 and examined their ability to  
208 restore pH<sub>cyt</sub> on transfer to pH 8.15. Nearly all cells acclimated to pH 8.15 or 8.75 showed a  
209 substantial decrease in cytosolic [H<sup>+</sup>] on transfer from pH 6.5 to 8.15 (Fig. 4e). However, many  
210 cells acclimated to pH 7.55 showed little or no capacity to lower cellular [H<sup>+</sup>] on transfer from  
211 pH 6.5 to 8.5, indicating the presence of distinct populations of responsive and unresponsive  
212 cells. (Fig. 4e-f). Thus, a significant proportion of cells acclimated to pH 7.55 exhibit a defect



213 in H<sup>+</sup> efflux, which likely reflects the highly reduced H<sup>+</sup> channel activity in these cells (Fig.  
214 3d).

215

### 216 **Pharmacological inhibition of H<sup>+</sup> channel function disrupts coccolith morphology**

217 Our results suggest that loss of H<sup>+</sup> channel function and subsequent disruption of pH  
218 homeostasis is directly responsible for the defects in calcification exhibited by *C. braarudii*  
219 grown at low pH. To directly test this hypothesis, we treated cells with two inhibitors of Hv  
220 channels, Zn<sup>2+</sup><sup>23</sup> and 2-guanidinobenzimidazole (2-GBI)<sup>46</sup>. Cells grown in 35 μM Zn<sup>2+</sup>, which  
221 inhibits the outward H<sup>+</sup> conductance in *C. braarudii* by approximately 60%<sup>21</sup>, showed only a  
222 small reduction in growth rate (control 0.54 ± 0.01 d<sup>-1</sup> compared to Zn<sup>2+</sup>-treated 0.47 ± 0.01 d<sup>-1</sup>,  
223 n=3, se) (Fig. 5a). However, SEM examination of Zn<sup>2+</sup>-treated cells after 5 d revealed severe  
224 disruptions of coccolith morphology (Fig. 5b-d). Importantly, Zn-treated cells exhibited the  
225 unique type-pH coccolith malformations, which were completely absent from control cells.  
226 Growth of cells in 15 μM 2-GBI for 5 d also resulted in the presence of type-pH coccolith  
227 malformations (Supplementary Fig.8), suggesting that this calcification phenotype is  
228 specifically associated with impaired H<sup>+</sup> channel function. Our results show that  
229 pharmacological inhibition of the H<sup>+</sup> current leads to highly specific malformations in coccolith  
230 morphology (type-pH) that have only previously been observed in cells grown at low pH.

## 231 Discussion

232 We have shown that voltage-gated H<sup>+</sup> channels play a critical role in pH homeostasis  
233 during coccolith formation. Hv channels are regulated by the plasma membrane H<sup>+</sup>  
234 electrochemical gradient and are primed to respond to decreases in intracellular pH, allowing  
235 rapid H<sup>+</sup> efflux to restore intracellular pH<sup>21</sup>. However, as extracellular pH decreases to values  
236 predicted in future ocean acidification scenarios, H<sup>+</sup> efflux diminishes to the extent where this  
237 mechanism is no longer effective. Under such conditions, H<sup>+</sup> channel function may only be  
238 maintained by reduced pH<sub>cyt</sub> or depolarisation of the membrane potential, with likely  
239 pronounced impacts on other physiological processes. Indeed, the loss of capacity to generate  
240 outward H<sup>+</sup> currents shown here in cells acclimated to lower pH suggests a physiological need  
241 to switch off this mechanism of pH<sub>cyt</sub> control. Our results also indicate that alternative  
242 mechanisms to maintain cytosolic pH homeostasis, such as energised forms of H<sup>+</sup> transport  
243 (e.g. H<sup>+</sup>-ATPases, Na<sup>+</sup>/H<sup>+</sup> exchangers), are incapable of dealing with the exceptional H<sup>+</sup> load  
244 generated by intracellular calcification (Supplementary Table 2). Loss of H<sup>+</sup> channel function  
245 will therefore lead to cytoplasmic acidosis unless calcification rate is reduced. The reliance on  
246 H<sup>+</sup> channels for pH homeostasis may constrain the ability of coccolithophores to adapt to lower  
247 pH environments.

248 The inactivation of the outward H<sup>+</sup> current at low seawater pH most likely involves  
249 changes in protein translation or post-translational modifications that modify channel  
250 activation. Elucidating these cellular mechanisms will be key in determining whether the loss  
251 of H<sup>+</sup> channel function is reversible. Long-term experiments examining whether  
252 coccolithophores may eventually adapt to ocean acidification conditions have yielded complex  
253 results, but support a trend of decreased calcification rates<sup>47, 48</sup>. Whilst physiological  
254 adaptations to low seawater pH are possible, such as recruiting alternative mechanisms for pH  
255 regulation or reducing calcification rates to lower the H<sup>+</sup> load, these would either incur  
256 increased energetic costs or reduce the overall degree of calcification in future populations  
257 (Supplementary Table 2). The substantial heterogeneity in individual cell responses to low pH  
258 observed in the present study is also likely to be significant in determining how selection may  
259 operate on natural populations.

260 The sensitivity of *C. braarudii* calcification to low pH may not only be relevant to  
261 future ocean scenarios, but may also contribute to its distribution in current oceans. *C.*  
262 *braarudii* is commonly found in temperate regions, including the Iberian and Benguela  
263 upwelling systems that are associated with significant variability in seawater pH<sup>35, 36, 49</sup>. It is

264 notable that *C. braarudii* populations in the Iberian Peninsula are predominately associated  
265 with frontal systems at the periphery of the upwelled waters <sup>35</sup>, rather than directly within the  
266 upwelling regions that experience the greatest extremes of seawater pH.

267         Calculated cellular H<sup>+</sup> budgets differ considerably between coccolithophore species. In  
268 heavily-calcified species, where calcification can occur at twice the rate of photosynthesis <sup>10</sup>,  
269 rapid removal of excess H<sup>+</sup> is essential. However, in lightly-calcified species H<sup>+</sup> production by  
270 calcification may be balanced by H<sup>+</sup> consumption during photosynthesis, resulting in a much  
271 lower dependence on functional H<sup>+</sup> channels. Calcification status may therefore be an  
272 important determinant in the sensitivity of coccolithophores to ocean acidification. A recent  
273 meta-analysis of multiple species revealed that the sensitivity of calcification rate to elevated  
274 seawater CO<sub>2</sub> showed a strong positive correlation to PIC/POC ratio <sup>11</sup>. Moreover, heavily-  
275 calcified species such as *Calcidiscus leptoporus* and *Gephyrocapsa oceanica* show highly  
276 malformed coccoliths under future ocean acidification conditions, whereas coccolith  
277 morphology in lightly-calcified species, such as *Syracosphaera pulchra*, *Chrysotila carterae*  
278 and *Ochrosphaera neopolitana* is less sensitive <sup>15, 25, 27, 47, 50</sup>. Indeed, evidence from boron  
279 isotope approaches indicated that *O. neopolitana* is able to maintain a constant pH in the  
280 coccolith vesicle over a range of seawater carbonate chemistries, although the pH range  
281 examined was relatively narrow (pH 8.05-8.35) <sup>25</sup>. Our data provide mechanistic insight into  
282 the differential sensitivity of coccolithophore species, suggesting that H<sup>+</sup> load is likely to be  
283 the key determinant of their sensitivity to ocean acidification. This conclusion is seemingly at  
284 odds with observations of over-calcified morphotypes of *E. huxleyi* at higher CO<sub>2</sub> levels in the  
285 Southern Ocean <sup>51</sup>, and millennial-scale trends indicating a correlation between increasing  
286 prevalence of ‘over-calcified’ morphotypes of *E. huxleyi* with increased atmospheric CO<sub>2</sub> over  
287 approximately the past 150 ka <sup>52</sup>. However, laboratory analyses of ‘over-calcified’ *E. huxleyi*  
288 morphotypes suggest that this phenotype relates primarily to coccolith morphology rather than  
289 calcification rate, as their PIC/POC ratios are not higher than those with normal coccolith  
290 morphology <sup>53</sup>.

291         While non-specific defects in coccolith morphology reflecting reduced calcification in  
292 response to ocean acidification have been observed in many studies <sup>15, 37</sup>, the unique  
293 malformations observed here in *C. braarudii* now provide a mechanistic link between seawater  
294 pH, the ability to regulate pH<sub>cyt</sub> and coccolith morphology. The highly specific nature of the *C.*  
295 *braarudii* malformations may facilitate the identification of low pH stress in environmental  
296 populations and aid the characterisation of past ocean acidification events in the fossil record

297 <sup>37</sup>. Modelled reconstructions indicate that, apart from the last ca 25 Ma, surface ocean pH has  
298 been lower than at present over much of the 200 Ma since the emergence of calcifying  
299 coccolithophores <sup>54, 55</sup>. This suggests that coccolithophores possess some capacity to adapt to  
300 the lowering of seawater pH over geological timescales. However, the very rapid predicted  
301 decline in surface ocean pH driven by anthropogenic CO<sub>2</sub> emissions may limit the degree to  
302 which coccolithophores can adapt their physiology. Recent evidence indicates that the mass  
303 extinction event at the (K-Pg) boundary (66 MYA), which led to the loss of 90% of  
304 coccolithophore species, was associated with rapid ocean acidification <sup>56</sup>. It is notable that  
305 many of the coccolithophore species that survived the K-Pg Cretaceous–Paleogene mass  
306 extinction event were coastal species <sup>57-59</sup>, which may have been better suited to variable  
307 seawater pH and therefore less sensitive to ocean acidification.

308 Multiple environmental parameters in addition to carbonate chemistry are predicted to  
309 change in future oceans, including temperature, nutrient availability and ecosystem scale  
310 changes in the abundance of predators, pathogens and competitors <sup>60</sup>. Predicting the response  
311 of coccolithophore populations to future environmental change is therefore highly complex.  
312 Our incomplete understanding of the haplo-diplontic life cycle of coccolithophores further  
313 limits our ability to predict how natural populations may respond to unfavourable conditions  
314 <sup>61</sup>. However, our results show that the physiology of heavily-calcified species such as *C.*  
315 *braarudii* is best suited to a constant seawater pH and that calcification is likely to be severely  
316 affected by ocean acidification. The ability of coccolithophores to calcify intracellularly, which  
317 has facilitated the evolution of remarkably diverse coccolith architecture, required the  
318 development of specialised physiological mechanisms for pH homeostasis that ultimately may  
319 constrain the ability of certain species to adapt to rapid changes in ocean pH.

320

## 321 **Methods**

322

### 323 **Cell culturing**

324 Cultures of *Coccolithus braarudii* (PLY182g) (formerly *Coccolithus pelagicus* ssp. *braarudii*)  
325 were grown in sterile-filtered seawater containing additions of nitrate, phosphate, trace metals  
326 and vitamins according to standard F/2 medium as described previously <sup>41</sup>. Silicon, selenium  
327 and nickel were also supplemented in concentrations of 10  $\mu\text{M}$ , 0.0025  $\mu\text{M}$  and 0.0022  $\mu\text{M}$ ,  
328 respectively. Dilute-batch cultures were maintained at 15°C under an irradiance of 50  $\mu\text{mol m}^{-2}$   
329  $\text{s}^{-1}$  with a 16:8 h light:dark cycle. Cells were cultured in autoclaved borosilicate bottles with  
330 minimal headspace and gas-tight lids to avoid in- and outgassing of  $\text{CO}_2$  (Duran Group, Mainz,  
331 Germany).

332

### 333 **Acclimation to various seawater pH**

334 Cultures were pre-acclimated for 4 d in a range of seawater pH/carbonate chemistry conditions  
335 and then used to inoculate test cultures (Supplementary Table 1). Triplicate cultures were used  
336 for all analyses, except for the  $\text{pH}_{\text{cyt}}$  measurements where 5 replicate cultures were grown.  
337 Growth rates and coccolith morphology were determined after 5 d in test conditions (i.e. a  
338 minimum of 9 d acclimation). Physiological measurements ( $\text{pH}_{\text{cyt}}$ , patch clamp) were  
339 performed between 5-10 d after inoculation into test conditions. Adjustment of seawater  
340 pH/carbonate chemistry was performed by modulating total alkalinity (TA) with amounts of  
341 HCl or NaOH at constant DIC in sealed containers. Cell density was kept between 500 and  
342 4000 cells  $\text{mL}^{-1}$  to minimise carbonate chemistry drifts. Carbonate chemistry was measured  
343 immediately after cell inoculation and at the end of the acclimation period measuring  $\text{pH}_{\text{NBS}}$   
344 and total alkalinity TA with a pH meter (Mettler Toledo, UK) and alkalinity titrator (TitroLine  
345 alpha plus, Schott Instruments, Germany). TA measurements were corrected with certified  
346 reference materials (CRM; provided by A. Dickson; Scripps Institution of Oceanography,  
347 U.S.A.). Data was accuracy-corrected with certified reference materials supplied by A.  
348 Dickson (Scripps Institution of Oceanography, US). Calculations were made with CO2SYS <sup>62</sup>.

349

### 350 **Phenotypic changes in physiology**

351 Cell growth was assessed by daily cell counting with Sedgewick Rafter counting chamber  
352 (Graticule Optics, UK) using a Leica DM 1000 LED light microscope. Specific growth rates  
353 ( $\mu$ ) were calculated from daily increments in cell concentrations counted every 24 or 48 h <sup>63</sup>.

354 Cellular POC content was estimated by measuring the area of decalcified cells microscopically.  
355 The area was converted to volume, assuming cells were spherical. The mean volume [ $\mu\text{m}^3$ ] of  
356 at least 20 – 50 cells per culture was converted into POC quota using the equation:

$$357 \quad \text{POC} [\text{pg cell}^{-1}] = a \times V^b$$

358 where  $a$  and  $b$  are constants (0.216 and 0.939, respectively) for non-diatom protists<sup>64</sup>. The  
359 cellular PIC contents were also estimated microscopically, using the volume of the  
360 coccosphere. To obtain the cellular PIC quota, the volume of the coccolith is required. The  
361 following equation was used.

$$362 \quad V_c = k_s \times L^3$$

363 Here,  $V_c$  is the volume of coccoliths and can be estimated using coccolith length  $L$  and the  
364 shape constant  $k_s$ <sup>65</sup> which is 0.06 for *C. braarudii*. The cellular PIC quota is calculated from  
365 the following equation:

$$366 \quad \text{PIC} [\text{pg cell}^{-1}] = n \times V_c \times \rho \times (M_c / M_{\text{CaCO}_3})$$

367 where  $n$  is the total number of coccoliths per cell including the discarded coccoliths;  $\rho$  is the  
368 calcite density of  $2.7 \text{ pg } \mu\text{m}^{-3}$  assuming coccoliths are pure calcite;  $M_c / M_{\text{CaCO}_3}$  is the molar  
369 mass ratio of C and  $\text{CaCO}_3$ .

370 Time points for sampling cell volumes ( $t = 10 \text{ h}$  after the onset of the light phase) were chosen  
371 in order present daily means (according to a modified version of the model provided in<sup>63</sup>).  
372 Production rates of POC and PIC ( $\text{pmol cell}^{-1} \text{ d}^{-1}$ ) were approximated as cellular POC content  
373 [ $\text{pmol cell}^{-1}$ ]  $\times \mu \times [\text{d}^{-1}]$  or cellular PIC content [ $\text{pmol cell}^{-1}$ ]  $\times \mu \times [\text{d}^{-1}]$ , respectively.  
374 Determination of pH optima was performed by determining the vertex of a polynomial fit  
375 (second order) of three independent experiments (each experiment consists of triplicate cultures  
376 acclimated to the five different seawater pH).

377

### 378 **Calculation of the proton motive force**

379 The proton motive force (pmf) at the different seawater pH was estimated as

$$380 \quad \text{pmf} = (zF V_m + (RT \ln([H^+]_i/[H^+]_o)))/F$$

381 where  $z$  is the electrical charge of  $\text{H}^+$ ,  $F$  is the Faraday constant [ $\text{J V}^{-1} \text{ mol}^{-1}$ ],  $V_m$  is resting  
382 membrane potential [V],  $R$  is the gas constant [ $\text{J mol}^{-1} \text{ K}^{-1}$ ] and  $T$  is temperature [K]. We used  
383 a value of  $-46 \text{ mV}$  for  $V_m$ , which represents a mean of previously measured values in *C.*

384 *braarudii*<sup>21</sup>. To show how changes in  $\text{pH}_{\text{cyt}}$  and  $V_m$  may influence pmf during changes in  $\text{pH}_o$ ,  
385 we calculated pmf using two values for  $\text{pH}_{\text{cyt}}$  (6.8 and 7.1) and resting  $V_m$  (-46 and -28 mV).

386

### 387 **Calculation of $\text{H}^+$ production rates**

388  $\text{H}^+$  production and consumption during photosynthesis and calcification were calculated based  
389 on POC and PIC production rates. To determine the possible range for net  $\text{H}^+$  load, we  
390 estimated maximal and minimal values based on a cell taking up only  $\text{CO}_2$  (no  $\text{H}^+$  consumed  
391 per C fixed during photosynthesis, 2  $\text{H}^+$  generated per C precipitated during calcification) or  
392 taking up only  $\text{HCO}_3^-$  (1  $\text{H}^+$  consumed per C fixed during photosynthesis, 1  $\text{H}^+$  generated per  
393 C precipitated during calcification).

394

### 395 **Scanning electron microscopy analysis of coccolith morphology**

396 Samples for SEM analysis were filtered on polycarbonate filters (0.8  $\mu\text{m}$  pore-size), dried in a  
397 drying cabinet at 50°C for 24 h, then sputter-coated with gold-palladium using an Emitech  
398 K550 sputter coater at the Plymouth Electron Microscopy Centre (PEMC). Scanning electron  
399 micrographs were produced with both Jeol JSM-6610LV and Jeol JSM-7001F at PEMC. The  
400 following categories were used to describe coccolith morphology of *C. braarudii*: normal;  
401 minor malformation (element malformation that does not impair interlocking); major  
402 malformation (shield malformation that impairs interlocking); malformation type-R (gap in  
403 both shields so that the shield elements do not form a closed oval shape); rhomb-like  
404 malformation (elements severely malformed displaying rhomb-like crystal morphology);  
405 incomplete (closed oval shape, but with incompletely grown shield elements that do not exhibit  
406 malformations); type-pH (closed oval shape, but with short shield elements exhibiting  
407 malformations) (Fig. 2). Despite a superficial similarity between the categories “incomplete”  
408 and “type-pH” that can make them difficult to distinguish in the light microscope, they are  
409 easily distinguished in SEM. An incomplete coccolith indicates that coccolith growth was  
410 stopped prematurely, but it does not indicate a malfunctioning of the morphogenetic  
411 machinery. Therefore, the label “incomplete” should only be applied to coccoliths that do not  
412 feature any malformations<sup>66,67</sup>. A malformed coccolith contains individual elements that have  
413 a disrupted morphology, rather than just an abnormal size. An average of ~350 coccoliths was  
414 analysed per replicate culture flask, with triplicate cultures examined for each treatment<sup>68</sup>.  
415 Coccolith categorization and counting employed standard methodologies as described in detail  
416 in<sup>66</sup>.

### 417 ***C. braarudii* Patch-Clamp Recording and Analysis**

418 *C. braarudii*, cells were decalcified by washing cells with Ca<sup>2+</sup>-free ASW containing 25 mM  
419 EGTA<sup>21, 41</sup>. The recording chamber volume was 1.5 cm<sup>3</sup>, and solutions exchanged using  
420 gravity-fed input and suction output at a rate of 5 cm<sup>3</sup> min<sup>-1</sup>. Patch electrodes were pulled from  
421 filamented borosilicate glass (1.5 mm OD, 0.86mm ID) using a P-97 puller (Sutter Instruments,  
422 Novato, CA, USA) to resistances of 3-6 MΩ. All external and pipette solutions are described  
423 in Supplementary Table 3. Sorbitol was added to pipette solutions to adjust the osmolarity to  
424 1,200 mOsmol kg<sup>-1</sup>. Liquid junction potentials were calculated using the junction potential tool  
425 in Clampex (Molecular Devices, Sunnyvale, CA) and corrected off-line. Whole cell  
426 capacitance and seal resistance (leak) were periodically monitored during experiments by  
427 applying a <5 mV test pulse. Currents were linear leak subtracted in Clampfit (Molecular  
428 Devices, Sunnyvale, CA) using the pre-test seal resistance. Current voltage relations were  
429 determined on leak subtracted families by measuring the maximum steady state amplitude  
430 (averaging between 10 and 50 ms of the current trace). Reversal potentials were determined by  
431 manually measuring the peak tail currents of leak subtracted families of traces and calculating  
432 a linear regression versus test voltage. Series resistance was monitored throughout the  
433 experiments and whole cell currents were analysed only from recordings in which series  
434 resistance varied by less than 15%.

435

### 436 **Cloning of *C. braarudii* HV2 into mammalian expression vector**

437 HV2 (CAMPEP\_0183380698) from *C. braarudii* was identified by sequence similarity  
438 searches of the *C. braarudii* transcriptome (MMETSP0164)<sup>45</sup> using *C. braarudii* HV1 as a  
439 query (ADM25825.1). The predicted coding sequence for HV2 was synthesised (GenScript,  
440 Piscataway, NJ) after being codon-optimised for expression in human cells, and sub-cloned  
441 into pcDNA3.1-C-eGFP using *HindIII* and *BamHI*. A 6 bp Kozak sequence (GCCACC) was  
442 included upstream of the ATG, and the stop codon removed.

### 443 **Culturing and transfection of HEK293 Cells**

444 HEK293 cells (ATCC CRL-1573) were cultured at 37°C in a humidified atmosphere  
445 containing 95% CO<sub>2</sub> in a Dulbecco's modified Eagle's medium (DMEM, Gibco, 12800-017)  
446 containing 10% fetal bovine serum (Gibco™ Fetal Bovine Serum, Qualified, Cat. 26140095),  
447 2 mM glutamine, penicillin 100 U mL<sup>-1</sup> and streptomycin 100 µg mL<sup>-1</sup>. Cells were passaged  
448 every 3 to 4 d at 1:6 or 1:12 dilutions (cell mm<sup>-2</sup>). HEK293 cells were plated for transfection



449 onto 35 mm poly-L-lysine coated glass-bottom dishes (35-mm) (www.ibidi.com).  
450 Transfections of HEK293 were performed with 1.0  $\mu\text{g}$  of expression vector using  
451 Lipofectamine 2000 (ThermoFisher). After 12 to 30 h of incubation, cells were rinsed and  
452 maintained with fresh growth media until used for electrophysiological experiments. Cells  
453 exhibiting GFP fluorescence were subsequently selected for electrophysiological analysis.  
454 HEK293 cells transfected with pCDNA3.1-eGFP alone were used as a control.

#### 455 456 **HEK293 Whole Cell Patch-Clamp Electrophysiology**

457 Standard whole-cell patch recordings were performed at room temperature with a Multiclamp  
458 700B amplifier (Molecular Devices, Sunnyvale, California) under the control of pClamp10  
459 software (Molecular Devices, Sunnyvale, California). Patch electrodes were pulled from  
460 filamented borosilicate glass (1.5 mm OD, 0.86mm ID) using a P-97 puller (Sutter Instruments,  
461 Novato, CA, USA) to resistances of 3-6  $\text{M}\Omega$ . Voltage errors incurred from the liquid junction  
462 potentials (LJPs) and series resistance (recorded from the amplifier) were corrected by  
463 subtraction post hoc. These corrected voltages were used to plot IV curves and in all subsequent  
464 investigations.  
465

#### 466 **Intracellular pH Measurements**

467 For  $\text{pH}_{\text{cyt}}$  measurements, *C. braarudii* cells were loaded with the cell-permeant acetoxymethyl  
468 ester for of the pH sensitive fluorescent dye, carboxy SNARF-1. Cells were incubated with  
469 SNARF-1 (5  $\mu\text{M}$ ) for 20-40 minutes, before being washed with ASW and placed in a poly-  
470 lysine coated imaging dish. Cells were imaged using a Nikon Ti Eclipse fluorescence (TIRF)  
471 system, equipped with a Photometrics Evolve EM-CCD camera and a Photometrics DV2  
472 beamsplitter. SNARF-1 was excited between 540-560 nm and fluorescence emission was  
473 captured at 580 nm (570-590nm) and 630 nm (620-640 nm). Images were recorded at the rate  
474 of 3.3 frames  $\text{s}^{-1}$  (300 ms exposure). Background fluorescence was minimal and was therefore  
475 not subtracted.

476  $\text{pH}_{\text{cyt}}$  values at acclimation conditions were derived by measuring SNARF-1 fluorescence in  
477 ASW with identical carbonate chemistry to that used for acclimation. For each treatment,  $\text{pH}_{\text{cyt}}$   
478 was measured on a minimum of three independent days. To measure the response of cells to  
479 changes in external pH ( $\text{pH}_o$ ), acclimated cells were loaded with SNARF-1 in control ASW at  
480 pH 8.15.  $\text{pH}_o$  was then changed by consecutively perfusing the cells with ASW of pH 6.55,  
481 7.55 and 8.75 for 5 minute time intervals (flow-through approximately 3  $\text{mL min}^{-1}$  in 0.5 mL  
482 total volume). In a final step, cells were washed with ASW of pH 8.15 to determine the  $\text{pH}_{\text{cyt}}$

483 drift between the beginning and the end of the experiment. If the  $\text{pH}_{\text{cyt}}$  offset was  $> 4\%$ ,  
484 measurements were discarded from analysis.

485 For image processing, the mean fluorescence emission ratio ( $F_{630}/F_{580}$ ) was determined using  
486 a region of interest encompassing the whole cell. We were unable to achieve a satisfactory *in*  
487 *vivo* calibration for SNARF-loaded cells using the nigericin technique, as we found that dye  
488 fluorescence was not stable after the addition of this protonophore. We therefore used an *in*  
489 *vitro* calibration, measuring the fluorescence emission ratio ( $F_{630}/F_{580}$ ) of SNARF-1 (40  $\mu\text{M}$ )  
490 in buffer (130 mM KCl, 1 mM  $\text{MgCl}_2$ , 15 mM HEPES) of a range of pH (pH 6.75 - 7.5). From  
491 the calibration curve, the following relation was obtained ( $R^2=0.86$ ):

$$492 \text{pH}_{\text{cyt}} = (0.8205 \times \ln(F_{630}/F_{580})) + 7.1101$$

493

#### 494 **qPCR analysis of gene expression**

495 Quantitative reverse-transcriptase polymerase chain reaction (qPCR) was performed for *HVI*  
496 and *HV2* in cultures acclimated to pH 7.55, 8.15 and 8.75 (in triplicates). The expression of  
497 two endogenous reference genes (ERGs), *EFL* and *RPS1*, was measured alongside expression  
498 of the two target genes. Primers were designed to amplify products approximately 150 bp in  
499 length. Primer quality was tested by performing efficiency curves for serial dilutions (1:5) of  
500 each primer pair (efficiencies were  $> 98\%$ ,  $R^2$  values  $> 0.96$ ). RNA was extracted from *C.*  
501 *braarudii* cells using the Isolate II RNA Mini Kit (Bioline) with on column DNA digestion. 30  
502 ml of exponential growth phase culture (approximately 4,000 cells  $\text{mL}^{-1}$ ) was centrifuged at  
503 3800 g for 5 min at  $4^\circ\text{C}$ . Quality and quantity of extracted RNA were tested using a Nanodrop  
504 1000 (Thermo Fisher Scientific) ( $A_{260}/A_{280}$  ratios  $> 1.80$ ). cDNA was synthesised from 50 ng  
505 RNA using a SensiFAST cDNA Synthesis Kit (Bioline), with a combination of random  
506 hexamers and oligo dT primers. No Reverse-Transcriptase Controls (NRTCs) were generated  
507 to ensure no DNA contamination had occurred. qPCR runs were performed using a Rotorgene  
508 6000 cycler (Qiagen, USA). Each reaction (20  $\mu\text{L}$ ) consisted of 1  $\mu\text{L}$  of cDNA substrate and  
509 19  $\mu\text{L}$  of a SensiFAST No-ROX Kit Master Mix (Bioline, UK). Following primer optimisation,  
510 0.4  $\mu\text{M}$  primer were used for all genes. PCR cycles were run with Rotorgene Q series software,  
511 comprising an initial  $95^\circ\text{C}$  2 min hold period, 40 cycles of  $95^\circ\text{C}$  denaturing for 5 s,  $62^\circ\text{C}$   
512 annealing for 10 s and  $72^\circ\text{C}$  extension step (acquisition at end of extension step) for 20 s. A  
513 high resolution melt (HRM) curve, 72 -  $95^\circ\text{C}$  with  $1^\circ\text{C}$  ramp was conducted after amplification  
514 to ensure all amplicons had comparable melting temperatures.

515 For each sample, 1  $\mu$ L of cDNA were analysed in technical triplicates (target genes) or  
516 duplicates (reference genes). One qPCR plate contained all *HV1* or *HV2* primer reactions (or  
517 the NRTCs), as well as the ERG reactions (*EFL* and *RPS1*), control reactions (= *HV1* expressed  
518 in the pH 8.15 acclimation), no template controls (NTC) and two positive controls. Stability of  
519 the ERG was tested using geNorm<sup>69</sup>. qPCR data were analysed using a efficiency corrected  
520 DDCt method, normalizing to the geometric mean of the two ERGs<sup>69</sup>. Expression of *EFL* in  
521 all NRTC was at least 10 Ct smaller than the sample.

522

### 523 **Phylogenetic Analyses**

524 Previously identified Hv1 sequences from coccolithophores<sup>21</sup> were used as queries for  
525 sequence similarity searches of the available haptophyte transcriptomes within the Marine  
526 Microbial Eukaryote Sequencing Project<sup>45, 70</sup>; reassembled reads NCBI accession  
527 PRJEB37117). Further Hv sequences from other representative protist lineages were obtained  
528 from the Joint Genome Institute (<https://phycocosm.jgi.doe.gov/phycocosm/home>). Protist Hv  
529 sequences possess an extended extracellular loop between transmembrane domains S1 and S2  
530<sup>21,44</sup>, enabling the generation of a longer multiple sequence alignment and improved resolution  
531 of the haptophyte Hv sequences. Hv sequences from other lineages (e.g. animals) lack the  
532 extended S1-S2 loop, although phylogenetic trees constructed with a wider range of eukaryotes  
533 exhibited a similar topology. Potential Hv sequences identified by sequence similarity searches  
534 were manually inspected using a multiple sequence alignment to assess the presence of  
535 conserved residues essential for H<sup>+</sup> channel function<sup>23</sup>. The multiple sequence alignments were  
536 then refined using GBLOCKS 0.91b to remove poorly aligned residues<sup>71</sup>. Phylogenetic  
537 analysis was performed using the maximum likelihood method within MEGAX software<sup>72</sup>  
538 after prior determination of the best substitution model (WAG with gamma and invariant).

539

### 540 **Statistical analyses**

541 For coccolith morphologies mean and SEM values were calculated from experimental  
542 replicates with a minimum of 350 coccoliths scored for each replicate. For electrophysiology  
543 means and SEM values were calculated from individual replicate cells from each treatment,  
544 with n numbers given in each Fig. For intracellular pH measurements, differences in pH  
545 between treatments were tested with 1-way ANOVA Holm-Sidak post hoc tests. Differences  
546 in distribution of pH values between treatments were assessed with 2-sample Kolmogorov-  
547 Smirnov tests.

## 548 References

- 549 1. Doney, S.C., Fabry, V.J., Feely, R.A. & Kleypas, J.A. Ocean acidification: the other  
550 CO<sub>2</sub> problem. *Ann Rev Mar Sci* **1**, 169-192 (2009).
- 551 2. Rost, B., Zondervan, I. & Wolf-Gladrow, D. Sensitivity of phytoplankton to future  
552 changes in ocean carbonate chemistry: current knowledge, contradictions and research  
553 directions. *Mar Ecol-Prog Ser* **373**, 227-237 (2008).
- 554 3. Jiang, L.Q., Carter, B.R., Feely, R.A., Lauvset, S.K. & Olsen, A. Surface ocean pH and  
555 buffer capacity: past, present and future. *Scientific reports* **9**, 18624 (2019).
- 556 4. Hofmann, G.E. *et al.* High-frequency dynamics of ocean pH: a multi-ecosystem  
557 comparison. *PLoS One* **6**, e28983 (2011).
- 558 5. Wootton, J.T., Pfister, C.A. & Forester, J.D. Dynamic patterns and ecological impacts  
559 of declining ocean pH in a high-resolution multi-year dataset. *Proc Natl Acad Sci U S*  
560 *A* **105**, 18848-18853 (2008).
- 561 6. Capone, D. & Hutchins, D. Microbial biogeochemistry of coastal upwelling regimes in  
562 a changing ocean. *Nat Geosci* **6**, 711-717 (2013).
- 563 7. Waldbusser, G.G. & Salisbury, J.E. Ocean acidification in the coastal zone from an  
564 organism's perspective: multiple system parameters, frequency domains, and habitats.  
565 *Ann Rev Mar Sci* **6**, 221-247 (2014).
- 566 8. Balch, W.M. The Ecology, Biogeochemistry, and Optical Properties of  
567 Coccolithophores. *Annual Review of Marine Science, Vol 10* **10**, 71-98 (2018).
- 568 9. Balch, W.M. *et al.* Coccolithophore distributions of the North and South Atlantic  
569 Ocean. *Deep-Sea Res Pt I* **151** (2019).
- 570 10. Bach, L.T., Riebesell, U., Gutowska, M.A., Federwisch, L. & Schulz, K.G. A unifying  
571 concept of coccolithophore sensitivity to changing carbonate chemistry embedded in  
572 an ecological framework. *Prog Oceanogr* **135**, 125-138 (2015).
- 573 11. Gafar, N.A., Eyre, B.D. & Schulz, K.G. Particulate inorganic to organic carbon  
574 production as a predictor for coccolithophorid sensitivity to ongoing ocean  
575 acidification. *Limnol Oceanogr Lett* **4**, 62-70 (2019).
- 576 12. Kroeker, K.J. *et al.* Impacts of ocean acidification on marine organisms: quantifying  
577 sensitivities and interaction with warming. *Global Change Biol* **19**, 1884-1896 (2013).
- 578 13. Meyer, J. & Riebesell, U. Reviews and Syntheses: Responses of coccolithophores to  
579 ocean acidification: a meta-analysis. *Biogeosciences* **12**, 1671-1682 (2015).
- 580 14. Raven, J.A. & Crawford, K. Environmental controls on coccolithophore calcification.  
581 *Mar Ecol Prog Ser* **470**, 137-166 (2012).
- 582 15. Langer, G. *et al.* Species-specific responses of calcifying algae to changing seawater  
583 carbonate chemistry. *Geochem Geophys Geosy* **7** (2006).
- 584 16. Bach, L.T. *et al.* Dissecting the impact of CO<sub>2</sub> and pH on the mechanisms of  
585 photosynthesis and calcification in the coccolithophore *Emiliana huxleyi*. *New*  
586 *Phytologist* **199**, 121-134 (2013).
- 587 17. Sikes, C.S., Roer, R.D. & Wilbur, K.M. Photosynthesis and Coccolith Formation -  
588 Inorganic Carbon-Sources and Net Inorganic Reaction of Deposition. *Limnology and*  
589 *Oceanography* **25**, 248-261 (1980).
- 590 18. Taylor, A.R., Brownlee, C. & Wheeler, G. Coccolithophore Cell Biology: Chalking Up  
591 Progress. *Annu Rev Mar Sci* **9**, 283-310 (2017).
- 592 19. Bach, L.T., Bauke, C., Meier, K.J.S., Riebesell, U. & Schulz, K.G. Influence of  
593 changing carbonate chemistry on morphology and weight of coccoliths formed by  
594 *Emiliana huxleyi*. *Biogeosciences* **9**, 3449-3463 (2012).
- 595 20. Bach, L.T., Riebesell, U. & Schulz, K.G. Distinguishing between the effects of ocean  
596 acidification and ocean carbonation in the coccolithophore *Emiliana huxleyi*.  
597 *Limnology and Oceanography* **56**, 2040-2050 (2011).

- 598 21. Taylor, A.R., Chrachri, A., Wheeler, G., Goddard, H. & Brownlee, C. A voltage-gated  
599 H<sup>+</sup> channel underlying pH homeostasis in calcifying coccolithophores. *PLoS Biol* **9**,  
600 e1001085 (2011).
- 601 22. Suffrian, K., Schulz, K.G., Gutowska, M.A., Riebesell, U. & Bleich, M. Cellular pH  
602 measurements in *Emiliania huxleyi* reveal pronounced membrane proton permeability.  
603 *New Phytol* **190**, 595-608 (2011).
- 604 23. DeCoursey, T.E. Voltage-gated proton channels: molecular biology, physiology, and  
605 pathophysiology of the H(V) family. *Physiol Rev* **93**, 599-652 (2013).
- 606 24. Fresnel, J. & Probert, I. The ultrastructure and life cycle of the coastal coccolithophorid  
607 *Ochrosphaera neapolitana* (Prymnesiophyceae). *European Journal of Phycology* **40**,  
608 105-122 (2005).
- 609 25. Liu, Y.W., Eagle, R.A., Aciego, S.M., Gilmore, R.E. & Ries, J.B. A coastal  
610 coccolithophore maintains pH homeostasis and switches carbon sources in response to  
611 ocean acidification. *Nature communications* **9** (2018).
- 612 26. Saez, A.G., Zaldivar-Riveron, A. & Medlin, L.K. Molecular systematics of the  
613 Pleurochrysidaceae, a family of coastal coccolithophores (Haptophyta). *Journal of*  
614 *Plankton Research* **30**, 559-566 (2008).
- 615 27. White, M.M. *et al.* Calcification of an estuarine coccolithophore increases with ocean  
616 acidification when subjected to diurnally fluctuating carbonate chemistry. *Mar Ecol*  
617 *Prog Ser* **601**, 59-76 (2018).
- 618 28. Daniels, C.J. *et al.* Species-specific calcite production reveals *Coccolithus pelagicus* as  
619 the key calcifier in the Arctic Ocean. *Mar Ecol Prog Ser* **555**, 29-47 (2016).
- 620 29. Daniels, C.J., Sheward, R.M. & Poulton, A.J. Biogeochemical implications of  
621 comparative growth rates of *Emiliania huxleyi* and *Coccolithus* species. *Biogeosciences*  
622 **11**, 6915-6925 (2014).
- 623 30. Hernandez, A.S.R. *et al.* Coccolithophore biodiversity controls carbonate export in the  
624 Southern Ocean. *Biogeosciences* **17**, 245-263 (2020).
- 625 31. Krug, S.A., Schulz, K.G. & Riebesell, U. Effects of changes in carbonate chemistry  
626 speciation on *Coccolithus braarudii*: a discussion of coccolithophorid sensitivities.  
627 *Biogeosciences* **8**, 771-777 (2011).
- 628 32. Muller, M.N. *et al.* Response of the coccolithophores *Emiliania huxleyi* and  
629 *Coccolithus braarudii* to changing seawater Mg<sup>2+</sup> and Ca<sup>2+</sup> concentrations: Mg/Ca,  
630 Sr/Ca ratios and delta Ca-44/40, delta Mg-26/24 of coccolith calcite. *Geochimica Et*  
631 *Cosmochimica Acta* **75**, 2088-2102 (2011).
- 632 33. Kottmeier, D.M., Rokitta, S.D. & Rost, B. H<sup>+</sup>-driven increase in CO<sub>2</sub> uptake and  
633 decrease in HCO<sub>3</sub><sup>-</sup> uptake explain coccolithophores' acclimation responses to ocean  
634 acidification. *Limnology and Oceanography* **61**, 2045-2057 (2016).
- 635 34. Kottmeier, D.M., Rokitta, S.D., Tortell, P.D. & Rost, B. Strong shift from HCO<sub>3</sub><sup>-</sup> to  
636 CO<sub>2</sub> uptake in *Emiliania huxleyi* with acidification: new approach unravels acclimation  
637 versus short-term pH effects. *Photosynthesis Research* **121**, 265-275 (2014).
- 638 35. Cachao, M. & Moita, M.T. *Coccolithus pelagicus*, a productivity proxy related to  
639 moderate fronts off Western Iberia. *Mar Micropaleontol* **39**, 131-155 (2000).
- 640 36. Giraudeau, J., Monteiro, P.M.S. & Nikodemus, K. Distribution and malformation of  
641 living coccolithophores in the northern Benguela upwelling system off Namibia. *Mar*  
642 *Micropaleontol* **22**, 93-110 (1993).
- 643 37. Faucher, G., Riebesell, U. & Bach, L.T. Can morphological features of  
644 coccolithophores serve as a reliable proxy to reconstruct environmental conditions of  
645 the past? *Clim Past* **16**, 1007-1025 (2020).
- 646 38. Riebesell, U. *et al.* Reduced calcification of marine plankton in response to increased  
647 atmospheric CO<sub>2</sub>. *Nature* **407**, 364-367 (2000).

- 648 39. Durak, G.M. *et al.* A role for diatom-like silicon transporters in calcifying  
649 coccolithophores. *Nature communications* **7**, 10543 (2016).
- 650 40. Gerecht, A.C., Supraha, L., Edvardsen, B., Langer, G. & Henderiks, J. Phosphorus  
651 availability modifies carbon production in *Coccolithus pelagicus* (Haptophyta). *J Exp*  
652 *Mar Biol Ecol* **472**, 24-31 (2015).
- 653 41. Taylor, A.R. & Brownlee, C. A novel Cl<sup>-</sup> inward-rectifying current in the plasma  
654 membrane of the calcifying marine phytoplankton *Coccolithus pelagicus*. *Plant*  
655 *Physiology* **131**, 1391-1400 (2003).
- 656 42. Taylor, A.R., Brownlee, C. & Wheeler, G.L. Proton channels in algae: reasons to be  
657 excited. *Trends Plant Sci* **17**, 675-684 (2012).
- 658 43. Kigundu, G., Cooper, J.L. & Smith, S.M.E. Hv 1 Proton Channels in Dinoflagellates:  
659 Not Just for Bioluminescence? *J Eukaryot Microbiol* **65**, 928-933 (2018).
- 660 44. Rodriguez, J.D. *et al.* Identification of a vacuolar proton channel that triggers the  
661 bioluminescent flash in dinoflagellates. *PLoS One* **12**, e0171594 (2017).
- 662 45. Keeling, P.J. *et al.* The Marine Microbial Eukaryote Transcriptome Sequencing Project  
663 (MMETSP): Illuminating the Functional Diversity of Eukaryotic Life in the Oceans  
664 through Transcriptome Sequencing. *PLoS Biol* **12**, e1001889 (2014).
- 665 46. Hong, L., Kim, I.H. & Tombola, F. Molecular determinants of Hv1 proton channel  
666 inhibition by guanidine derivatives. *Proc Natl Acad Sci U S A* **111**, 9971-9976 (2014).
- 667 47. Fiorini, S., Middelburg, J.J. & Gattuso, J.P. Effects of elevated CO<sub>2</sub> partial pressure and  
668 temperature on the coccolithophore *Syracosphaera pulchra*. *Aquatic Microbial*  
669 *Ecology* **64**, 221-232 (2011).
- 670 48. Tong, S.Y., Gao, K.S. & Hutchins, D.A. Adaptive evolution in the coccolithophore  
671 *Gephyrocapsa oceanica* following 1,000 generations of selection under elevated CO<sub>2</sub>.  
672 *Global Change Biol* **24**, 3055-3064 (2018).
- 673 49. Padin, X.A., Velo, A. & Pérez, F.F. ARIOS: a database for ocean acidification  
674 assessment in the Iberian upwelling system (1976–2018). *Earth Syst. Sci. Data* **12**,  
675 2647–2663 (2020).
- 676 50. Hermoso, M. & Minoletti, F. Mass and Fine-Scale Morphological Changes Induced by  
677 Changing Seawater pH in the Coccolith *Gephyrocapsa oceanica*. *J Geophys Res-*  
678 *Biogeo* **123**, 2761-2774 (2018).
- 679 51. Rigual-Hernandez, A.S. *et al.* Full annual monitoring of Subantarctic *Emiliana huxleyi*  
680 populations reveals highly calcified morphotypes in high-CO<sub>2</sub> winter conditions.  
681 *Scientific reports* **10** (2020).
- 682 52. McClelland, H.L. *et al.* Calcification response of a key phytoplankton family to  
683 millennial-scale environmental change. *Scientific reports* **6**, 34263 (2016).
- 684 53. von Dassow, P. *et al.* Over-calcified forms of the coccolithophore *Emiliana huxleyi* in  
685 high-CO<sub>2</sub> waters are not preadapted to ocean acidification. *Biogeosciences* **15**, 1515-  
686 1534 (2018).
- 687 54. Honisch, B. *et al.* The geological record of ocean acidification. *Science* **335**, 1058-1063  
688 (2012).
- 689 55. Monteiro, F.M. *et al.* Why marine phytoplankton calcify. *Sci Adv* **2**, e1501822 (2016).
- 690 56. Henehan, M.J. *et al.* Rapid ocean acidification and protracted Earth system recovery  
691 followed the end-Cretaceous Chicxulub impact. *Proc Natl Acad Sci U S A* **116**, 22500-  
692 22504 (2019).
- 693 57. Bown, P.R., Lees, J.A. & Young, J.R. Calcareous nannoplankton evolution and  
694 diversity through time. *Coccolithophores: From Molecular Processes to Global*  
695 *Impact*, 481-508 (2004).
- 696 58. Gibbs, S.J. *et al.* Algal plankton turn to hunting to survive and recover from end-  
697 Cretaceous impact darkness. *Science Advances* **6** (2020).

- 698 59. Hagino, K. *et al.* Re-discovery of a "living fossil" coccolithophore from the coastal  
699 waters of Japan and Croatia. *Mar Micropaleontol* **116**, 28-37 (2015).
- 700 60. Van de Waal, D.B. & Litchman, E. Multiple global change stressor effects on  
701 phytoplankton nutrient acquisition in a future ocean. *Philos Trans R Soc Lond B Biol*  
702 *Sci* **375**, 20190706 (2020).
- 703 61. Frada, M.J., Bendif, E.M., Keuter, S. & Probert, I. The private life of coccolithophores.  
704 *Perspectives in Phycology* **6**, 11-30 (2018).
- 705 62. Xu, Y.Y., Pierrot, D. & Cai, W.J. Ocean carbonate system computation for anoxic  
706 waters using an updated CO2SYS program. *Mar Chem* **195**, 90-93 (2017).
- 707 63. Kottmeier, D.M., Terbruggen, A., Wolf-Gladrow, D.A. & Thoms, S. Diel variations in  
708 cell division and biomass production of *Emiliana huxleyi*-Consequences for the  
709 calculation of physiological cell parameters. *Limnology and Oceanography* **65**, 1781-  
710 1800 (2020).
- 711 64. Menden-Deuer, S. & Lessard, E.J. Carbon to volume relationships for dinoflagellates,  
712 diatoms, and other protist plankton. *Limnology and Oceanography* **45**, 569-579 (2000).
- 713 65. Young, J.R. & Ziveri, P. Calculation of coccolith volume and its use in calibration of  
714 carbonate flux estimates. *Deep-Sea Research Part 2. Topical Studies in Oceanography*  
715 **47**, 9-11 (2000).
- 716 66. Langer, G., Oetjen, K. & Brenneis, T. On culture artefacts in coccolith morphology.  
717 *Helgoland Mar Res* **67**, 359-369 (2013).
- 718 67. Young, J.R. & Westbroek, P. Genotypic Variation in the Coccolithophorid Species  
719 *Emiliana-huxleyi*. *Mar Micropaleontol* **18**, 5-23 (1991).
- 720 68. Langer, G. & Benner, I. Effect of elevated nitrate concentration on calcification in  
721 *Emiliana huxleyi*. *Journal of Nannoplankton Research* **30**, 77-80 (2009).
- 722 69. Vandesompele, J. *et al.* Accurate normalization of real-time quantitative RT-PCR data  
723 by geometric averaging of multiple internal control genes. *Genome Biol* **3**,  
724 RESEARCH0034 (2002).
- 725 70. Johnson, L.K., Alexander, H. & Brown, C.T. Re-assembly, quality evaluation, and  
726 annotation of 678 microbial eukaryotic reference transcriptomes. *Gigascience* **8** (2019).
- 727 71. Talavera, G. & Castresana, J. Improvement of phylogenies after removing divergent  
728 and ambiguously aligned blocks from protein sequence alignments. *Systematic biology*  
729 **56**, 564-577 (2007).
- 730 72. Kumar, S., Stecher, G., Li, M., Knyaz, C. & Tamura, K. MEGA X: Molecular  
731 Evolutionary Genetics Analysis across Computing Platforms. *Mol Biol Evol* **35**, 1547-  
732 1549 (2018).
- 733 73. Langer, G. *et al.* Role of silicon in the development of complex crystal shapes in  
734 coccolithophores. *New Phytol* (2021).
- 735 74. Blanco-Ameijeiras, S. *et al.* Phenotypic Variability in the Coccolithophore *Emiliana*  
736 *huxleyi*. *Plos. One* **11**, e0157697 (2016).
- 737 75. Bretherton, L. *et al.* Day length as a key factor moderating the response of  
738 coccolithophore growth to elevated pCO<sub>2</sub>. *Limnol. Oceanogr.* **64**, 1284-1296  
739 (2019).
- 740 76. Langer, G., Nehrke, G., Probert, I., Ly, J. & Ziveri, P. Strain-specific responses of  
741 *Emiliana huxleyi* to changing seawater carbonate chemistry. *Biogeosci.* **6**, 2637-2646  
742 (2009).
- 743 77. Sett, S. *et al.* Temperature Modulates Coccolithophorid Sensitivity of Growth,  
744 Photosynthesis and Calcification to Increasing Seawater pCO<sub>2</sub>. *Plos. One* **9**, e88308  
745 (2014).

746 78. Supraha, L., Gerecht, A.C., Probert, I. & Henderiks, J. Eco-physiological adaptation  
747 shapes the response of calcifying algae to nutrient limitation. *Sci. Reports* **5**, 16499  
748 (2015).

749 79. Zondervan, I., Rost, B. & Riebesell, U. Effect of CO<sub>2</sub> concentration on the PIC/POC  
750 ratio in the coccolithophore *Emiliania huxleyi* grown under light-limiting conditions  
751 and different daylengths. *J Exp Mar Biol Ecol* **272**, 55-70 (2002).

752

753

#### 754 **Data availability**

755 All data is deposited and archived on our institutional servers or relevant genomics databases,  
756 according to institutional and funders' requirements. Data will be made available from the  
757 corresponding authors on request following publication.

758

#### 759 **Acknowledgements**

760 The work was supported by an ERC Advanced Grant to CB (ERC-ADG-670390) and a NERC  
761 award to GLW (NE/N011708/1). Electron microscopy analyses were performed at the PEMC  
762 (Plymouth University, UK).

763

#### 764 **Author contributions**

765 DK, GLW and CB conceived the study. DK was responsible for the majority of experimental  
766 analyses, with AC performing electrophysiology and GL performing the SEM analysis of  
767 coccolith morphology. KEH performed cloning of *HV2*. DK, AC and GL analysed the data.  
768 DK, GLW and CB wrote the manuscript. All data will be made available on request following  
769 publication.

770 The authors declare that they have no competing interests.

771 All data needed to evaluate the conclusions in the paper are present in the paper and/or the  
772 Supplementary Materials. The data can be provided by the corresponding authors pending  
773 scientific review and a completed material transfer agreement. Requests for data should be  
774 submitted to the corresponding authors.

775



776

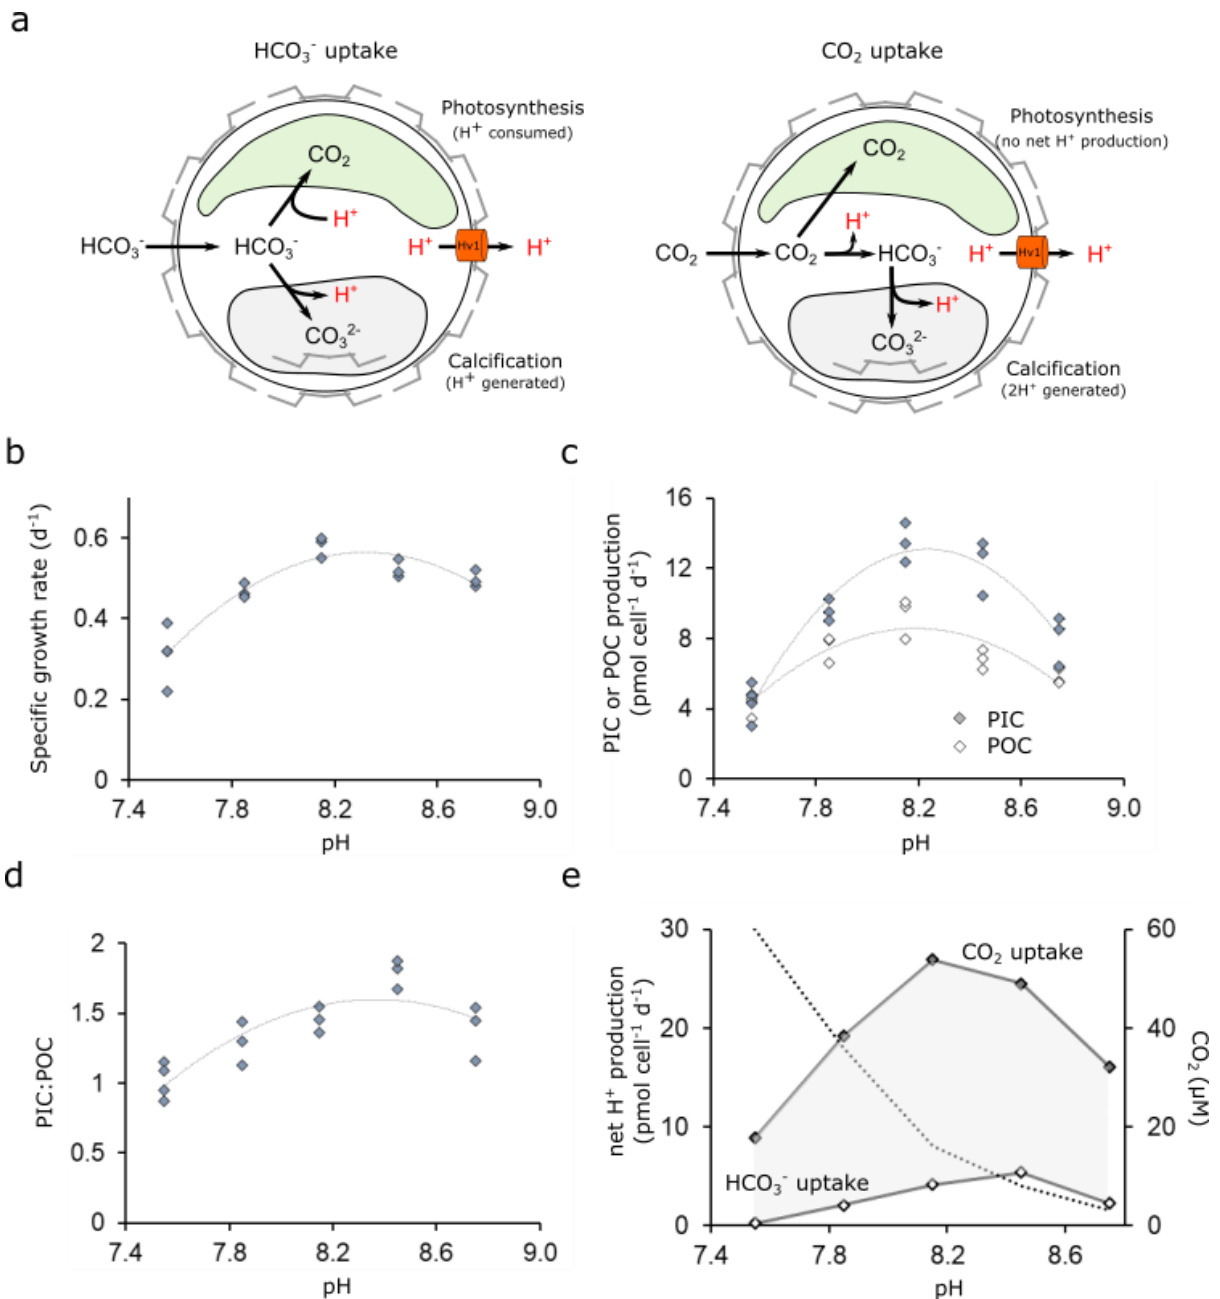

777

778

779 **Fig. 1. Physiology and H<sup>+</sup> fluxes of *Coccolithus braarudii* cells grown at different seawater**

780 **pH. a** Schematic indicating H<sup>+</sup> fluxes associated with photosynthesis and calcification in a

781 coccolithophore cell. Whilst many metabolic processes may contribute to the cellular H<sup>+</sup>

782 budget, these two processes are likely to be the major contributors. In a cell taking up HCO<sub>3</sub><sup>-</sup>,

783 the H<sup>+</sup> budget is balanced between H<sup>+</sup> consumed during photosynthesis and H<sup>+</sup> generated

784 during calcification. In a cell taking up CO<sub>2</sub>, 2 H<sup>+</sup> are produced for each molecule of CaCO<sub>3</sub>

785 produced and H<sup>+</sup> are no longer consumed during photosynthesis. Excess H<sup>+</sup> may be removed

786 from the cell by H<sup>+</sup> transporters in the plasma membrane, such as voltage-gated H<sup>+</sup> channels

787 (Hv). Coccolithophores take up both  $\text{HCO}_3^-$  and  $\text{CO}_2$  across the plasma membrane, with  
788 increasing proportions of DIC taken up as  $\text{CO}_2$  as seawater  $\text{CO}_2$  increases<sup>34</sup>. **b** Growth rate of  
789 *C. braarudii* cells acclimated to different seawater pH. n=3 replicates per treatment, line  
790 represents polynomial fit to mean. **c** Cellular production of particulate organic carbon (POC)  
791 through photosynthesis and particulate inorganic carbon (PIC) through calcification. The  
792 optima for both processes are close to the control conditions (pH 8.15). **d** As a consequence of  
793 the unequal changes in cellular POC and PIC production across the applied pH values, cellular  
794 PIC:POC ratios are minimal at pH 7.55 ( $\approx 1.0$ ) and maximal at pH 8.45 ( $\approx 1.8$ ). **e** Calculated net  
795  $\text{H}^+$  budgets under the different pH regimes, based on rates of photosynthesis and calcification  
796 shown in (c) (See Methods). The concentration of  $\text{CO}_2$  in seawater is also shown (dashed line).  
797 Estimates are shown for cells using taking up only  $\text{HCO}_3^-$  or only  $\text{CO}_2$ . As *C. braarudii* cells  
798 will likely take up a mixture of both DIC species, with a shift towards greater  $\text{CO}_2$  usage at  
799 elevated  $\text{CO}_2$ , the shaded area represents the potential range of  $\text{H}^+$  production. Regardless of  
800 DIC species used *C. braarudii* produces excess  $\text{H}^+$  at all applied pH values, but  $\text{H}^+$  production  
801 is much lower at pH 7.55 due to the decrease in calcification.  
802

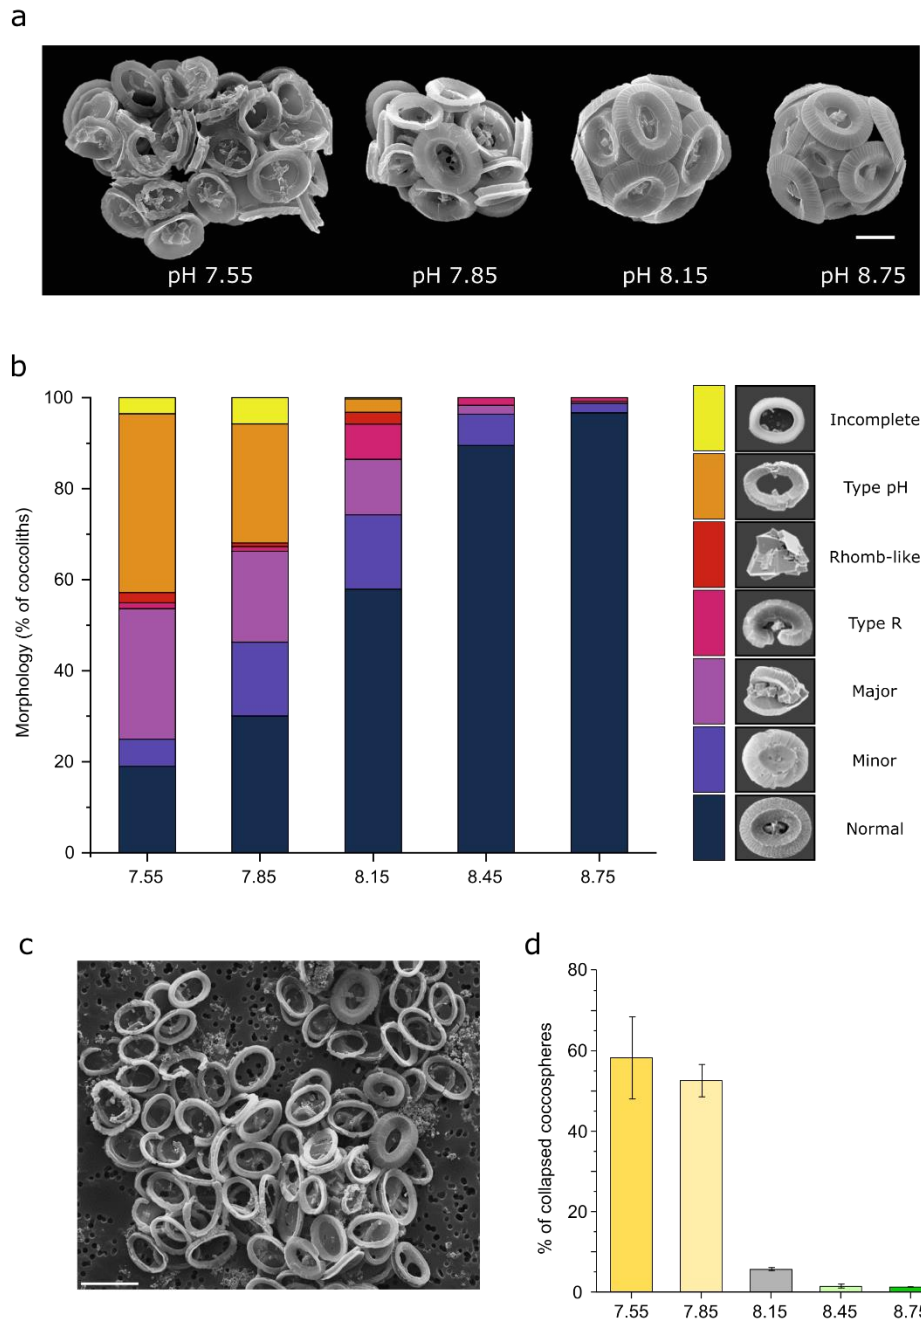

803

804 **Fig. 2. A unique defect in coccolith morphology occurs at low seawater pH. a**

805 Representative scanning electron micrographs of cells acclimated to pH 7.55, 7.85, 8.15 and

806 8.75. The majority of cells grown at pH  $\geq 8.15$  had intact coccospheres without crystal or

807 coccolith malformation. The majority of cells grown under acidified conditions produced

808 malformed coccoliths, resulting in abnormal or collapsed coccospheres. Bar = 5  $\mu\text{m}$  **b**

809 Quantification of coccolith malformations reveal an increasing proportion of defective

810 coccoliths with seawater acidification. Coccoliths were grouped into morphological categories  
811 (see Methods). The morphological categories representing rhomb-like, R-type, major and  
812 minor malformations are commonly observed *C. braarudii* cells grown under various stressors  
813 <sup>73</sup>. However, the distinct ‘type-pH’ was only observed in this study and appears unique to low  
814 pH (high CO<sub>2</sub>) conditions. The counts represent the mean of three independent replicates. A  
815 minimum of 350 coccoliths were counted for each replicate. **c** An example of *C. braarudii* cells  
816 grown at pH 7.55 exhibiting a high proportion of the distinctive ‘type-pH’ malformations. As  
817 the shield elements are not properly formed, the coccoliths are unable to interlock in the normal  
818 manner, resulting in the collapse of the coccospheres during preparation for SEM imaging. Bar  
819 = 10 μm. **d** The proportion of collapsed coccospheres increases at lower seawater pH. n= 3  
820 replicates per treatment. Error bars represent SE.  
821

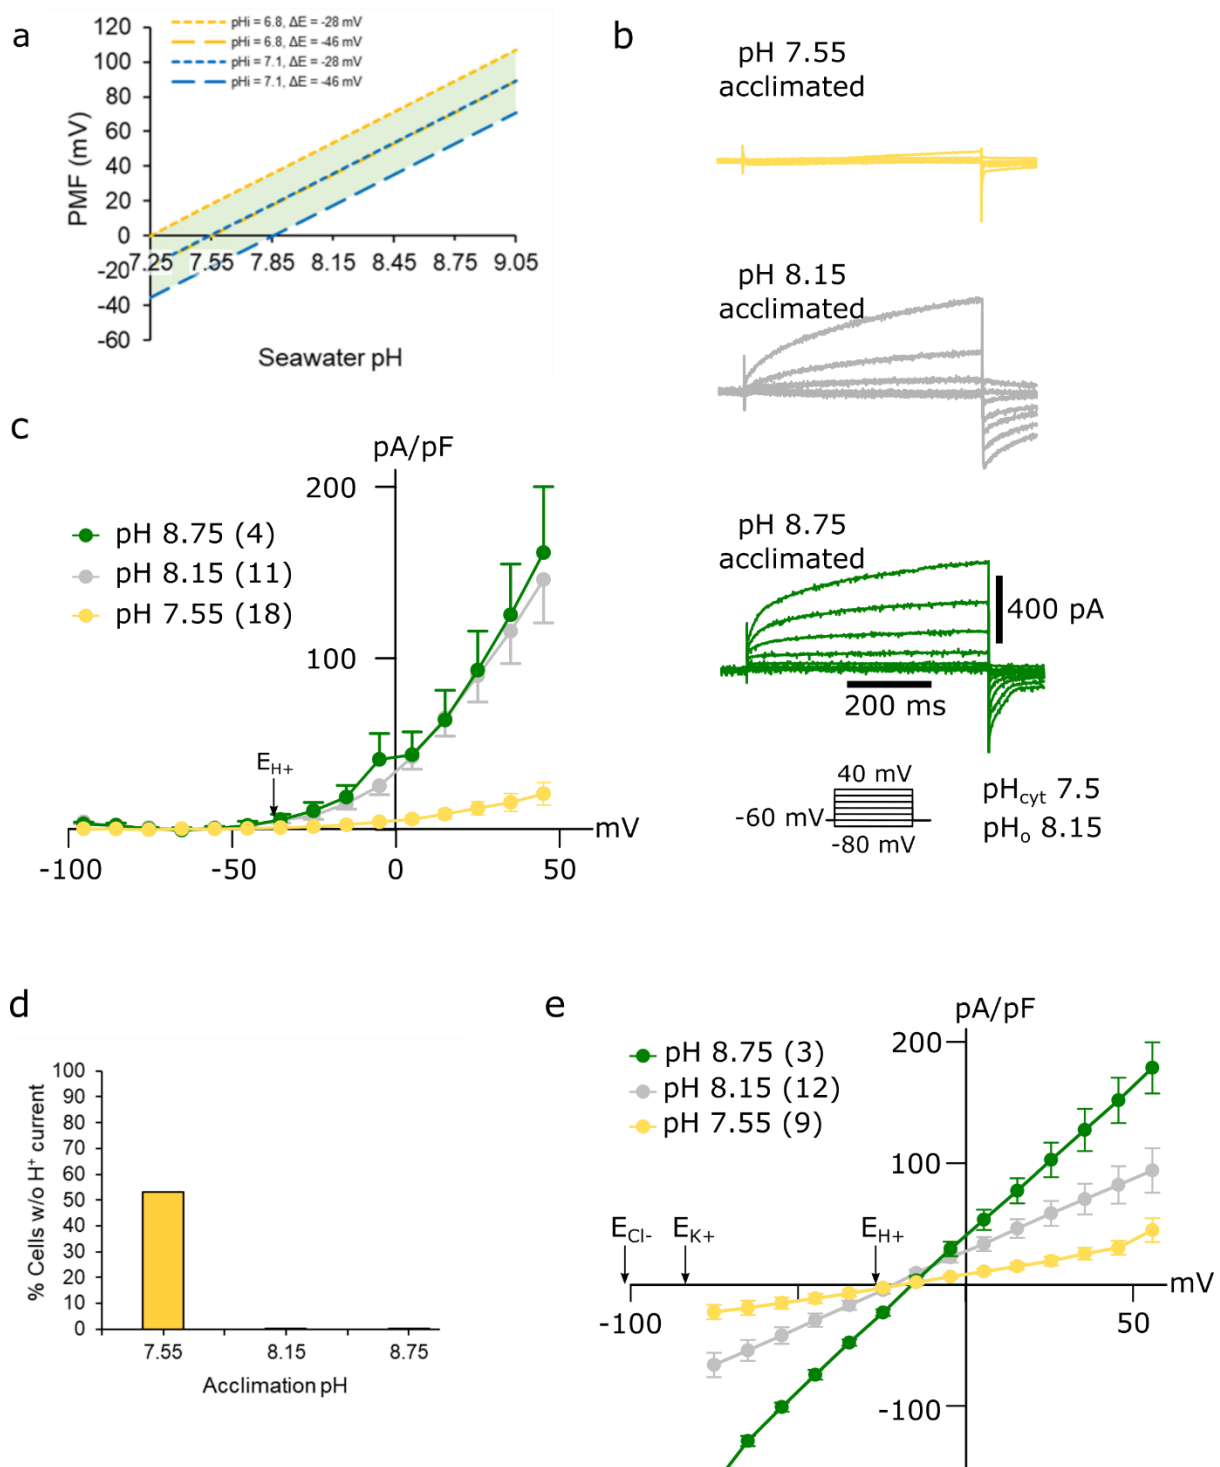

822

823

824 **Fig. 3: A reduced outward H<sup>+</sup> current in *C. braarudii* cells acclimated to low seawater pH.**

825 **a** Estimation of the impact of changes in seawater pH on the proton motive force (PMF) across  
 826 the plasma membrane. Models of PMF based on measured maximal or minimal pH<sub>cyt</sub> (pH 6.8  
 827 and 7.1: See Fig. 4) in combination with measured minimal and maximal ΔE (-46mV and -  
 828 28mV, <sup>21</sup>) suggest that PMF is close to zero at a seawater pH of approximately pH 7.55.

829 Therefore passive  $H^+$  efflux via voltage-gated  $H^+$  channels becomes unfavourable, unless  
830 mediated by excursions of  $pH_{\text{cyt}}$  (lower cytosolic pH) or  $V_m$  (depolarisation). **b**  
831 Electrophysiological measurements of whole cell currents in response to incremental 1 s 10  
832 mV depolarisations from -80 to +40 mV performed in artificial seawater buffered to pH 8.15.  
833 The large outward-directed ion current is predominately carried by  $H^+$ . The maximal current is  
834 much smaller in cells acclimated to pH 7.55. Example of currents from a single cell are shown  
835 for each pH treatment. **c** Mean whole cell currents (plotted as pA/pF vs mV) for acclimated  
836 cells. Outward currents are observed when the plasma membrane is depolarised to potentials  
837 more positive than the equilibrium potential of  $H^+$  ( $E_{H^+}$ ; arrow). Cells acclimated to pH 7.55  
838 exhibit a greatly reduced outward current. Values in parentheses represent n, bars represent SE.  
839 **d** The proportion of cells that do not show an outward current (defined as an outward current  
840  $<2.5$  pA/pF at +45 mV) is greatly increased in cultures acclimated to a seawater pH of 7.55  
841 compared to cultures acclimated to pH 8.15 or 8.75.  $n=18$ . **e** Tail current analysis indicating  
842 that reversal potentials ( $E_{\text{rev}}$ ) are close to  $E_{H^+}$  and more positive than the  $E_{K^+}$  and  $E_{Cl^-}$  in all  
843 treatments, suggesting that the observed currents in all treatments are predominately carried by  
844  $H^+$ .

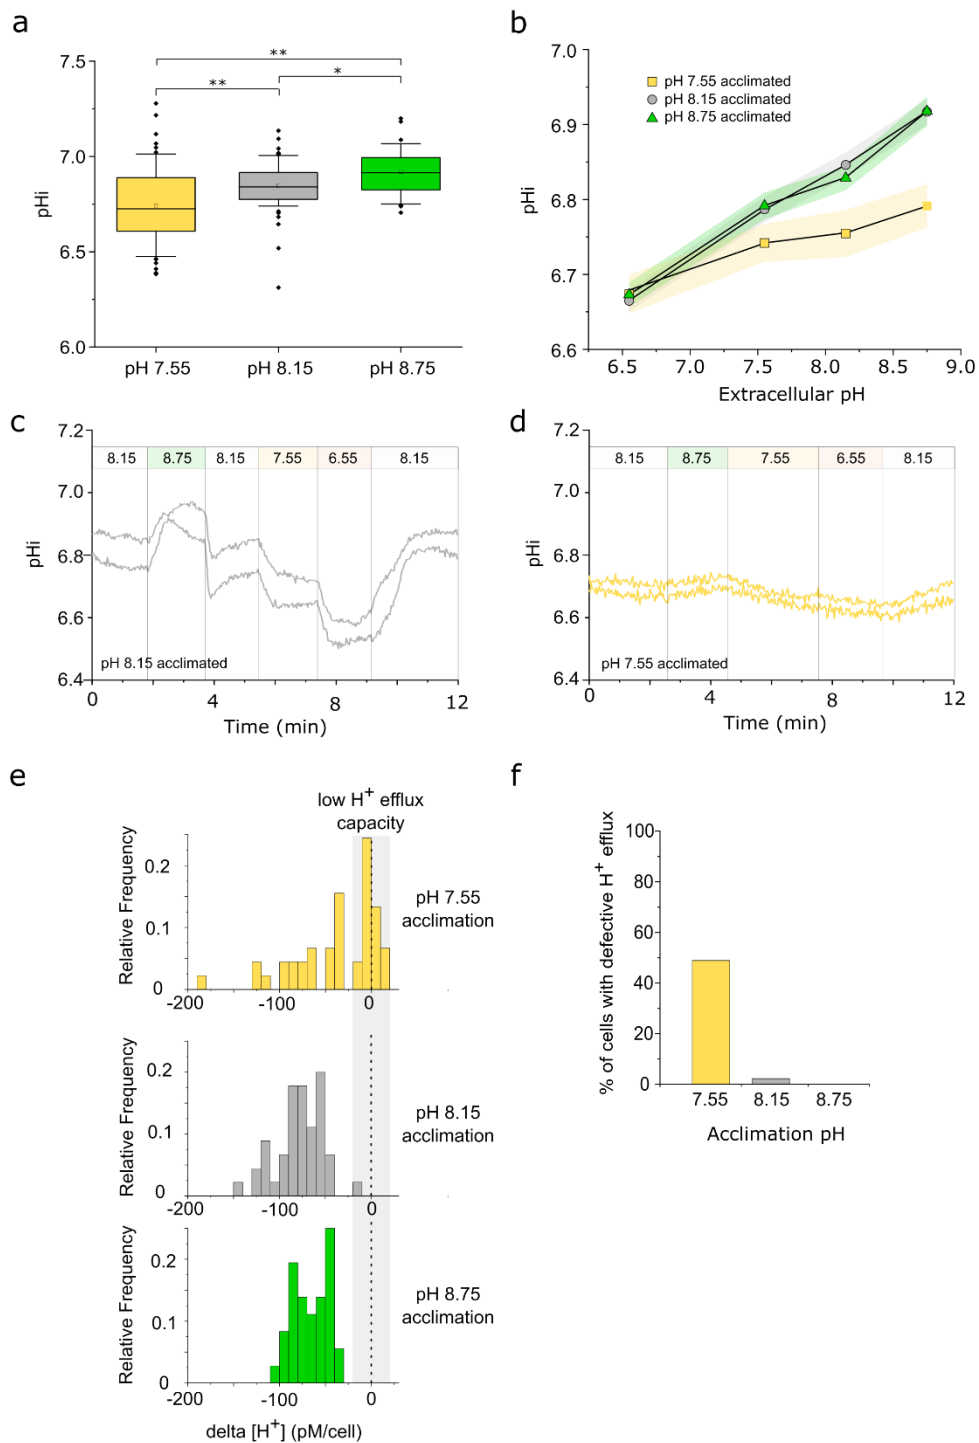

845

846 **Fig. 4: Changes in intracellular pH ( $pH_{\text{cyt}}$ ) in response to seawater acidification and**  
 847 **alkalinisation.** **a** Intracellular pH ( $pH_{\text{cyt}}$ ) measured at acclimation pH conditions in *C.*  
 848 *braarudii* cells loaded with the pH-responsive fluorescent dye SNARF-AM. Cells acclimated  
 849 to pH 7.55 show a lower mean  $pH_{\text{cyt}}$  to those acclimated to pH 8.15 and pH 8.75.  $n= 63, 61$  and  
 850 36 cells for pH 7.55, 8.15 and 8.75 respectively. 1-way ANOVA, Holm-Sidak post-hoc test, \*

851  $p < 0.05$ , \*\*  $p < 0.01$ . Box plots indicate mean (open square), median, 25-75<sup>th</sup> percentiles (box)  
852 and 10-90<sup>th</sup> percentiles (whiskers). **b**  $\text{pH}_{\text{cyt}}$  regulation following rapid changes in external pH.  
853 Acclimated cells were perfused with seawater at pH 6.55, 7.55, 8.15 and 8.75 for 2 minutes  
854 each to examine their ability to regulate  $\text{pH}_{\text{cyt}}$ . Cells acclimated to pH 8.15 and 8.75 show the  
855 rapid adjustment of  $\text{pH}_{\text{cyt}}$  typical of coccolithophore cells <sup>21,22</sup>. However, cells acclimated to  
856 pH 7.55 show a much lower change in  $\text{pH}_{\text{cyt}}$  ( $n=25, 61$  and  $36$  respectively for pH 7.55, 8.15  
857 and 8.75). Shaded areas represent SE. **c** Example of rapid changes in intracellular pH ( $\text{pH}_{\text{cyt}}$ )  
858 in cells acclimated to pH 8.15. Cells were perfused with ASW pH 8.15 and  $\text{pH}_i$  was monitored  
859 as the perfusion was switched to a higher or lower pH. Two representative cells are shown. **d**  
860 Example of cells acclimated to pH 7.55 exhibiting little change in  $\text{pH}_{\text{cyt}}$  following changes in  
861 external pH. Note that the time course of the perfusion differs slightly from that shown in (C).  
862 Two representative cells are shown. **e** Detailed examination of  $\text{pH}_{\text{cyt}}$  recovery during a  
863 transition from seawater pH 6.5 to seawater pH 8.15. The frequency histogram indicates the  
864 change in  $\text{pH}_{\text{cyt}}$  (shown as  $\Delta[\text{H}^+]$ ) in individual cells acclimated to different pH regimes. Whilst  
865 nearly all cells acclimated to pH 8.15 and 8.75 exhibit a substantial decrease in  $[\text{H}^+]$  on transfer  
866 from pH 6.5 to higher pH, many cells acclimated to pH 7.55 are unable to respond, indicative  
867 of a defect in  $\text{H}^+$  efflux.  $n=55, 61$  and  $36$  cells). Cells acclimated to pH 7.55 exhibit a  
868 significantly different distribution to pH 8.15 or 8.75 (2-sample Kolmogorov-Smirnov test,  
869  $p < 0.05$ ). **f** Proportions of cells exhibiting defective  $\text{H}^+$  efflux in the experiment described in  
870 (E). Defective  $\text{H}^+$  efflux was defined as a  $\Delta[\text{H}^+]$  less than 20 pM.

871



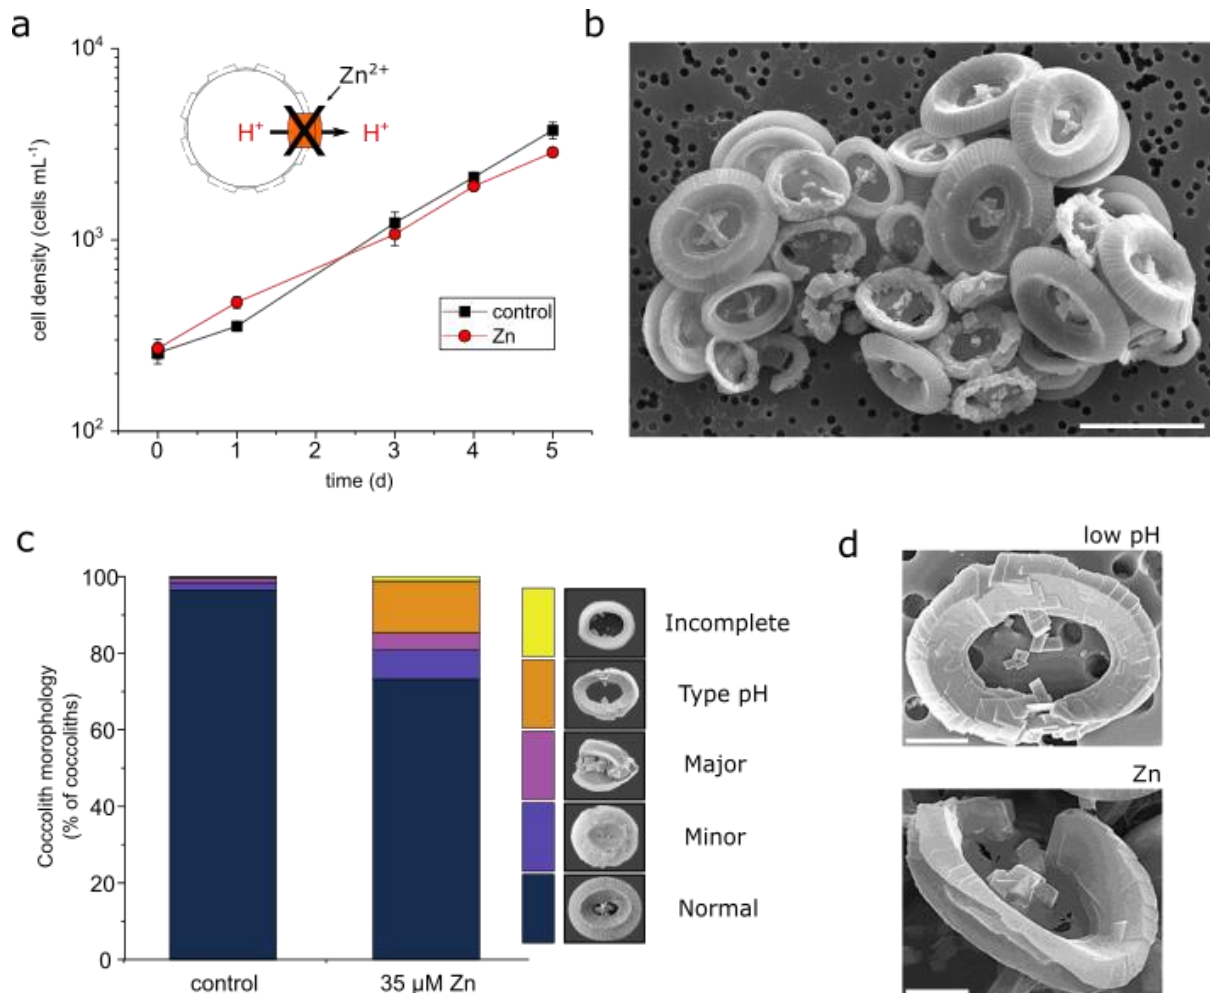

872

873

874 **Fig. 5: Effects of Hv inhibitors on coccolith morphology in *C. braarudii*.** **a** Cell growth in  
875 the presence of the H<sup>+</sup> channel inhibitor ZnCl<sub>2</sub> (35 μM) at seawater pH of 8.15. n=3. Error bars  
876 = SE. Application of a similar concentration of Zn (30 μM) results in a decrease of  
877 approximately 50% in the amplitude of the outward H<sup>+</sup> current<sup>21</sup>. **b** SEM image of *C. braarudii*  
878 cells treated with ZnCl<sub>2</sub> (35 μM) for 5 days showing the presence of many distinctive ‘type-  
879 pH’ coccolith malformations. Note also the collapse of the coccospheres due to the inability of  
880 the coccoliths to interlock. Bar = 10 μm. **c** Quantitative analysis of coccolith morphology.  
881 Coccoliths were categorised into morphological categories (see Methods). The counts  
882 represent the mean of three independent replicate treatments. A minimum of 350 coccoliths  
883 were counted for each replicate. Cells exposed to 35 μM Zn exhibit a substantial increase in  
884 the proportion of the distinctive type-pH coccolith malformations. **d** Higher resolution SEM  
885 images of type-pH morphological defects found in cells exposed to low pH (pH 7.55 from  
886 experiment described in Fig. 2) and Zn (35 μM). Bar = 2 μm.
